# Supplementary material
Source: ML conference proceedings conference paper supplement (https://proceedings.mlr.press/v70/li17g.html)
Supplement: Supplementary file 1 [file li17g-supp.pdf]

## Supplementary Materials

### A. Proof of Theorem 1

We first recall the following lemma.

**Lemma 1** (Lemma 1, (Gong et al., 2013)). *Under Assumption 1.3. For any  $\eta > 0$  and any  $\mathbf{x}, \mathbf{y} \in \mathbb{R}^d$  such that  $\mathbf{x} = \text{prox}_{\eta g}(\mathbf{y} - \eta \nabla f(\mathbf{y}))$ , one has that*

$$F(\mathbf{x}) \leq F(\mathbf{y}) - \left(\frac{1}{2\eta} - \frac{L}{2}\right) \|\mathbf{x} - \mathbf{y}\|^2.$$

Applying Lemma 1 with  $\mathbf{x} = \mathbf{x}_k, \mathbf{y} = \mathbf{y}_k$ , we obtain that

$$F(\mathbf{x}_k) \leq F(\mathbf{y}_k) - \left(\frac{1}{2\eta} - \frac{L}{2}\right) \|\mathbf{x}_k - \mathbf{y}_k\|^2. \quad (12)$$

Since  $\eta < \frac{1}{L}$ , it follows that  $F(\mathbf{x}_k) \leq F(\mathbf{y}_k)$ . Moreover, the update rule of APGnc guarantees that  $F(\mathbf{y}_{k+1}) \leq F(\mathbf{x}_k)$ . In summary, for all  $k$  the following inequality holds:

$$F(\mathbf{y}_{k+1}) \leq F(\mathbf{x}_k) \leq F(\mathbf{y}_k) \leq F(\mathbf{x}_{k-1}). \quad (13)$$

Combing further with the fact that  $F(\mathbf{x}_k), F(\mathbf{y}_k) \geq \inf F > -\infty$  for all  $k$ , we conclude that  $\{F(\mathbf{x}_k)\}, \{F(\mathbf{y}_k)\}$  converge to the same limit  $F^*$ , i.e.,

$$\lim_{k \rightarrow \infty} F(\mathbf{x}_k) = \lim_{k \rightarrow \infty} F(\mathbf{y}_k) = F^*. \quad (14)$$

On the other hand, by induction we conclude from eq. (13) that for all  $k$

$$F(\mathbf{y}_k) \leq F(\mathbf{x}_0), \quad F(\mathbf{x}_k) \leq F(\mathbf{x}_0).$$

Combining with Assumption 1.1 that  $F$  has bounded sublevel set, we conclude that  $\{\mathbf{x}_k\}$  and  $\{\mathbf{y}_k\}$  are bounded and thus have bounded limit points. Now combining eq. (12) and eq. (13) yields

$$\begin{aligned} \left(\frac{1}{2\eta} - \frac{L}{2}\right) \|\mathbf{y}_k - \mathbf{x}_k\|^2 &\leq F(\mathbf{y}_k) - F(\mathbf{x}_k) \\ &\leq F(\mathbf{y}_k) - F(\mathbf{y}_{k+1}), \end{aligned} \quad (15)$$

which, after telescoping over  $k$  and letting  $k \rightarrow \infty$ , becomes

$$\sum_{k=1}^{\infty} \left(\frac{1}{2\eta} - \frac{L}{2}\right) \|\mathbf{y}_k - \mathbf{x}_k\|^2 \leq F(\mathbf{y}_1) - \inf F < \infty. \quad (16)$$

This further implies that  $\|\mathbf{y}_k - \mathbf{x}_k\| \rightarrow 0$ , and hence  $\{\mathbf{x}_k\}$  and  $\{\mathbf{y}_k\}$  share the same set of limit points  $\Omega$ . Note that  $\Omega$  is closed (it is a set of limit points) and bounded, we conclude that  $\Omega$  is compact in  $\mathbb{R}^d$ .

By optimality condition of the proximal gradient step of APGnc, we obtain that

$$\begin{aligned} -\nabla f(\mathbf{y}_k) - \frac{1}{\eta}(\mathbf{x}_k - \mathbf{y}_k) &\in \partial g(\mathbf{x}_k) \\ \Leftrightarrow \underbrace{\nabla f(\mathbf{x}_k) - \nabla f(\mathbf{y}_k) - \frac{1}{\eta}(\mathbf{x}_k - \mathbf{y}_k)}_{\mathbf{u}_k} &\in \partial F(\mathbf{x}_k), \end{aligned} \quad (17)$$

which further implies that

$$\begin{aligned} \|\mathbf{u}_k\| &= \|\nabla f(\mathbf{x}_k) - \nabla f(\mathbf{y}_k) - \frac{1}{\eta}(\mathbf{x}_k - \mathbf{y}_k)\| \\ &\leq \left(L + \frac{1}{\eta}\right) \|\mathbf{y}_k - \mathbf{x}_k\| \rightarrow 0. \end{aligned} \quad (18)$$

Consider any limit point  $\mathbf{z}' \in \Omega$ , and w.l.o.g we write  $\mathbf{x}_k \rightarrow \mathbf{z}', \mathbf{y}_k \rightarrow \mathbf{z}'$  by restricting to a subsequence. By the definition of the proximal map, the proximal gradient step of APGnc implies that

$$\begin{aligned} \langle \nabla f(\mathbf{y}_k), \mathbf{x}_k - \mathbf{y}_k \rangle + \frac{1}{2\eta} \|\mathbf{y}_k - \mathbf{x}_k\|^2 + g(\mathbf{x}_k) \\ \leq \langle \nabla f(\mathbf{y}_k), \mathbf{z}' - \mathbf{y}_k \rangle + \frac{1}{2\eta} \|\mathbf{z}' - \mathbf{y}_k\|^2 + g(\mathbf{z}'). \end{aligned} \quad (19)$$

Taking  $\limsup$  on both sides and note that  $\mathbf{x}_k - \mathbf{y}_k \rightarrow 0$ ,  $\mathbf{y}_k \rightarrow \mathbf{z}'$ , we obtain that  $\limsup_{k \rightarrow \infty} g(\mathbf{x}_k) \leq g(\mathbf{z}')$ . Since  $g$  is lower semicontinuous and  $\mathbf{x}_k \rightarrow \mathbf{z}'$ , it follows that  $\limsup_{k \rightarrow \infty} g(\mathbf{x}_k) \geq g(\mathbf{z}')$ . Combining both inequalities, we conclude that  $\lim_{k \rightarrow \infty} g(\mathbf{x}_k) = g(\mathbf{z}')$ . Note that the continuity of  $f$  yields  $\lim_{k \rightarrow \infty} f(\mathbf{x}_k) = f(\mathbf{z}')$ , we then conclude that  $\lim_{k \rightarrow \infty} F(\mathbf{x}_k) = F(\mathbf{z}')$ . Since  $\lim_{k \rightarrow \infty} F(\mathbf{x}_k) = F^*$  by eq. (14), we conclude that

$$F(\mathbf{z}') \equiv F^*, \quad \forall \mathbf{z}' \in \Omega. \quad (20)$$

Hence,  $F$  remains constant on the compact set  $\Omega$ . To this end, we have established  $\mathbf{x}_k \rightarrow \mathbf{z}'$ ,  $F(\mathbf{x}_k) \rightarrow F(\mathbf{z}')$  and that  $\partial F(\mathbf{x}_k) \ni \mathbf{u}_k \rightarrow 0$ . Recall the definition of limiting sub-differential, we conclude that  $0 \in \partial F(\mathbf{z}')$  for all  $\mathbf{z}' \in \Omega$ .

## B. Proof of Theorem 2

Throughout the proof we assume that  $F(\mathbf{x}_k) \neq F^*$  for all  $k$  because otherwise the algorithm terminates and the conclusions hold trivially. We also denote  $k_0$  as a sufficiently large positive integer.

Combining eq. (12) and eq. (13) yields that

$$F(\mathbf{x}_{k+1}) \leq F(\mathbf{x}_k) - \left(\frac{1}{2\eta} - \frac{L}{2}\right) \|\mathbf{y}_{k+1} - \mathbf{x}_{k+1}\|^2. \quad (21)$$

Moreover, eq. (17) and eq. (18) imply that

$$\text{dist}_{\partial F(\mathbf{x}_k)}(\mathbf{0}) \leq \left(L + \frac{1}{\eta}\right) \|\mathbf{y}_k - \mathbf{x}_k\|. \quad (22)$$

We have shown in Appendix A that  $F(\mathbf{x}_k) \downarrow F^*$ , and it is also clear that  $\text{dist}_{\Omega}(\mathbf{x}_k) \rightarrow 0$ . Thus, for any  $\epsilon, \delta > 0$  and all  $k \geq k_0$ , we have

$$\mathbf{x}_k \in \{\mathbf{x} \mid \text{dist}_{\Omega}(\mathbf{x}) \leq \epsilon, F^* < F(\mathbf{x}) < F^* + \delta\}.$$

Since  $\Omega$  is compact and  $F$  is constant on it, the uniformized KL property implies that for all  $k \geq k_0$

$$\varphi'(F(\mathbf{x}_k) - F^*) \text{dist}_{\partial F(\mathbf{x}_k)}(\mathbf{0}) \geq 1. \quad (23)$$

Recall that  $r_k := F(\mathbf{x}_k) - F^*$ . Then eq. (23) is equivalent to

$$\begin{aligned} 1 &\leq (\varphi'(r_k) \text{dist}_{\partial F(\mathbf{x}_k)}(\mathbf{0}))^2 \\ &\stackrel{(i)}{\leq} (\varphi'(r_k))^2 \left(\frac{1}{\eta} + L\right)^2 \|\mathbf{y}_k - \mathbf{x}_k\|^2 \\ &\stackrel{(ii)}{\leq} (\varphi'(r_k))^2 \frac{\left(\frac{1}{\eta} + L\right)^2}{\frac{1}{2\eta} - \frac{L}{2}} [F(\mathbf{x}_{k-1}) - F(\mathbf{x}_k)] \\ &\leq d_1 (\varphi'(r_k))^2 (r_{k-1} - r_k), \end{aligned}$$

where (i) is due to eq. (22), (ii) follows from eq. (21), and  $d_1 = \left(\frac{1}{\eta} + L\right)^2 / \left(\frac{1}{2\eta} - \frac{L}{2}\right)$ . Since  $\varphi(t) = \frac{c}{\theta} t^\theta$ , we have that  $\varphi'(t) = ct^{\theta-1}$ . Thus the above inequality becomes

$$1 \leq d_1 c^2 r_k^{2\theta-2} (r_{k-1} - r_k). \quad (24)$$

It has been shown in (Frankel et al., 2015; Li & Lin, 2015) that sequence  $\{r_k\}$  satisfying the above inductive property converges to zero at different rates according to  $\theta$  as stated in the theorem.

## C. Proof of Theorem 3

$g$  non-convex,  $\epsilon_k = 0$ : In this setting, we first prove the following inexact version of Lemma 1.

**Lemma 2.** *Under Assumption 1.3. For any  $\eta > 0$  and any  $\mathbf{x}, \mathbf{y} \in \mathbb{R}^d$  such that  $\mathbf{x} = \text{prox}_{\eta g}(\mathbf{y} - \eta(\nabla f(\mathbf{y}) + \mathbf{e}))$ , one has that*

$$F(\mathbf{x}) \leq F(\mathbf{y}) + \left(\frac{L}{2} - \frac{1}{2\eta}\right) \|\mathbf{x} - \mathbf{y}\|^2 + \|\mathbf{x} - \mathbf{y}\| \|\mathbf{e}\|.$$

*Proof.* By Assumption 1.3 we have that

$$f(\mathbf{x}) \leq f(\mathbf{y}) + \langle \mathbf{x} - \mathbf{y}, \nabla f(\mathbf{y}) \rangle + \frac{L}{2} \|\mathbf{x} - \mathbf{y}\|^2.$$

Also, by the definition of proximal map, the proximal gradient step implies that

$$g(\mathbf{x}) + \frac{1}{2\eta} \|\mathbf{x} - \mathbf{y} + \eta(\nabla f(\mathbf{y}) + \mathbf{e})\|^2 \leq g(\mathbf{y}) + \frac{1}{2\eta} \|\eta(\nabla f(\mathbf{y}) + \mathbf{e})\|^2,$$

which, after simplifications becomes that

$$g(\mathbf{x}) \leq g(\mathbf{y}) - \frac{1}{2\eta} \|\mathbf{x} - \mathbf{y}\|^2 - \langle \mathbf{x} - \mathbf{y}, (\nabla f(\mathbf{y}) + \mathbf{e}) \rangle.$$

Combine the above two inequalities further gives that

$$F(\mathbf{x}) \leq F(\mathbf{y}) + \left(\frac{L}{2} - \frac{1}{2\eta}\right) \|\mathbf{x} - \mathbf{y}\|^2 + \|\mathbf{x} - \mathbf{y}\| \|\mathbf{e}\|.$$

□

Using Lemma 2 with  $\mathbf{x} = \mathbf{x}_k$ ,  $\mathbf{y} = \mathbf{y}_k$ ,  $\mathbf{e} = \mathbf{e}_k$  and notice the fact that  $\|\mathbf{e}_k\| \leq \gamma \|\mathbf{x}_k - \mathbf{y}_k\|$ , we obtain that

$$F(\mathbf{x}_k) \leq F(\mathbf{y}_k) + \left(\gamma + \frac{L}{2} - \frac{1}{2\eta}\right) \|\mathbf{x}_k - \mathbf{y}_k\|^2. \quad (25)$$

Moreover, the optimality condition of the proximal gradient step with gradient error gives that By optimality condition of the proximal gradient step of APGnc, we obtain that

$$\nabla f(\mathbf{x}_k) - \nabla f(\mathbf{y}_k) - \mathbf{e}_k - \frac{1}{\eta}(\mathbf{x}_k - \mathbf{y}_k) \in \partial F(\mathbf{x}_k),$$

which further implies that

$$\text{dist}_{\partial F(\mathbf{x}_k)}(\mathbf{0}) \leq \left(\gamma + L + \frac{1}{\eta}\right) \|\mathbf{y}_k - \mathbf{x}_k\|. \quad (26)$$

Notice that eq. (25) and eq. (26) are parallel to the key inequalities eq. (21) and eq. (22) in the analysis of exact APGnc. Thus, by choosing  $\eta < \frac{1}{2\gamma+L}$  and redefining  $d_1 = \left(\frac{1}{\eta} + L + \gamma\right)^2 / \left(\frac{1}{2\eta} - \frac{L}{2} - \gamma\right)$ , all the statements in Theorem 1 remain true and the convergence rates in Theorem 2 remain the same order with a worse constant.

*g convex:* We first present the following lemma.

**Lemma 3.** For any  $\mathbf{x}, \mathbf{v} \in \mathbb{R}^d$ , let  $\mathbf{u}' \in \partial_\epsilon g(\mathbf{x})$  such that  $\nabla f(\mathbf{x}) + \mathbf{u}'$  has minimal norm. Denote  $\xi := \text{dist}_{\partial g(\mathbf{x})}(\mathbf{u}')$ , then we have

$$\text{dist}_{\partial F(\mathbf{x})}(\mathbf{0}) \leq \text{dist}_{\nabla f(\mathbf{x}) + \partial_\epsilon g(\mathbf{x})}(\mathbf{0}) + \xi. \quad (27)$$

*Proof.* We observe the following

$$\begin{aligned} \text{dist}_{\partial F(\mathbf{x})}(\mathbf{0}) &= \min_{\mathbf{u} \in \partial g(\mathbf{x})} \|\nabla f(\mathbf{x}) + \mathbf{u}\| \\ &= \min_{\mathbf{u} \in \partial g(\mathbf{x})} \|\nabla f(\mathbf{x}) + \mathbf{u}' + \mathbf{u} - \mathbf{u}'\|, \quad \forall \mathbf{u}' \in \partial_\epsilon g(\mathbf{x}) \\ &\leq \|\nabla f(\mathbf{x}) + \mathbf{u}'\| + \min_{\mathbf{u} \in \partial g(\mathbf{x})} \|\mathbf{u} - \mathbf{u}'\|, \quad \forall \mathbf{u}' \in \partial_\epsilon g(\mathbf{x}) \\ &\leq \min_{\mathbf{u}' \in \partial_\epsilon} g(\mathbf{x}) \|\nabla f(\mathbf{x}) + \mathbf{u}'\| + \xi \\ &= \text{dist}_{\nabla f(\mathbf{x}) + \partial_\epsilon g(\mathbf{x})}(\mathbf{0}) + \xi. \end{aligned} \quad (28)$$

□

Recall that we have two inexactness, i.e.,  $\mathbf{x}_k = \text{prox}_{\eta g}^{\epsilon_k}(\mathbf{y}_k - \eta(\nabla f(\mathbf{y}_k) + \mathbf{e}_k))$ . Following a proof similar to that of Lemma 2 and notice that  $\epsilon_k \leq \delta \|\mathbf{x}_k - \mathbf{y}_k\|^2$ , we can obtain that

$$\begin{aligned} F(\mathbf{x}_k) &\leq F(\mathbf{y}_k) + \left(\gamma + \frac{L}{2} - \frac{1}{2\eta}\right) \|\mathbf{x}_k - \mathbf{y}_k\|^2 + \epsilon_k \\ &\leq F(\mathbf{y}_k) + \left(\gamma' + \frac{L}{2} - \frac{1}{2\eta}\right) \|\mathbf{x}_k - \mathbf{y}_k\|^2 \end{aligned} \quad (29)$$

for some  $\gamma' > \gamma > 0$ . Since  $g$  is convex, by Lemma 2 in (Schmidt et al., 2011) one can exhibit  $\mathbf{v}_k$  with  $\|\mathbf{v}_k\| \leq \sqrt{2\eta\epsilon_k}$  such that

$$\frac{1}{\eta}[\mathbf{y}_k - \mathbf{x}_k - \eta(\nabla f(\mathbf{y}_k) + \mathbf{e}_k) - \mathbf{v}_k] \in \partial_{\epsilon_k} g(\mathbf{x}_k).$$

This implies that

$$\text{dist}_{\nabla f(\mathbf{x}_k) + \partial_{\epsilon_k} g(\mathbf{x}_k)}(\mathbf{0}) \leq (\gamma + \frac{1}{\eta} + L)\|\mathbf{x}_k - \mathbf{y}_k\| + \sqrt{\frac{2\epsilon_k}{\eta}}.$$

Apply Lemma 3 and notice that  $\epsilon_k \leq \delta\|\mathbf{x}_k - \mathbf{y}_k\|^2$ ,  $\xi_k \leq \lambda\|\mathbf{x}_k - \mathbf{y}_k\|$ , we obtain that

$$\text{dist}_{\partial F(\mathbf{x}_k)}(\mathbf{0}) \leq (\gamma' + \frac{1}{\eta} + L)\|\mathbf{x}_k - \mathbf{y}_k\| \quad (30)$$

for some  $\gamma' > \gamma > 0$ . Now eq. (29) and eq. (30) are parallel to the key inequalities eq. (21) and eq. (22) in the analysis of exact APGnc. Thus, by choosing  $\eta < \frac{1}{2\gamma' + L}$  and redefining  $d_1 = (\frac{1}{\eta} + L + \gamma')^2 / (\frac{1}{2\eta} - \frac{L}{2} - \gamma')$ , all the statements in Theorem 1 remain true and the convergence rates in Theorem 2 remain the same order with a worse constant.

## D. Proof of Theorem 4

We first define the following quantities for the convenience of the proof.

$$c_t = c_{t+1}(1 + \frac{1}{m}) + \frac{\eta L^2}{2}, \quad c_m = 0, \quad (31)$$

$$R_k^t := \mathbb{E} [F(\mathbf{x}_k^t) + c_t \|\mathbf{x}_k^t - \mathbf{x}_k^0\|^2], \quad (32)$$

$$\bar{\mathbf{x}}_k^{t+1} = \text{prox}_{\eta g}(\mathbf{x}_k^t - \eta \nabla f(\mathbf{x}_k^t)). \quad (33)$$

Note that  $\bar{\mathbf{x}}_k^{t+1}$  is a reference sequence introduced for the convenience of analysis, and is not being computed in the implementation of the algorithm. Then it has been shown in the proof of Theorem 5 of (Reddi et al., 2016b) that

$$R_k^{t+1} \leq R_k^t + \left(L - \frac{1}{2\eta}\right) \mathbb{E} [\|\bar{\mathbf{x}}_k^{t+1} - \mathbf{x}_k^t\|^2]. \quad (34)$$

Telescoping eq. (34) over  $t$  from  $t = 1$  to  $t = m - 1$ , we obtain

$$\mathbb{E}[F(\mathbf{x}_k^m)] \leq \mathbb{E} \left[ F(\bar{\mathbf{x}}_k^1) + c_1 \|\bar{\mathbf{x}}_k^1 - \mathbf{x}_k^0\|^2 + \sum_{t=1}^{m-1} \left(L - \frac{1}{2\eta}\right) \|\bar{\mathbf{x}}_k^{t+1} - \mathbf{x}_k^t\|^2 \right]. \quad (35)$$

Following from eq. (31), a simple induction shows that  $c_t \leq \eta L^2 m$ . Setting  $\eta < \frac{1}{2L}$  and recalling that  $F(\mathbf{y}_k) \leq F(\mathbf{x}_{k-1}^m)$ , eq. (35) further implies that

$$\mathbb{E}[F(\mathbf{y}_{k+1})] \leq \mathbb{E}[F(\mathbf{x}_k^m)] \leq \mathbb{E}[F(\bar{\mathbf{x}}_k^1)] + \eta L^2 m \mathbb{E} [\|\bar{\mathbf{x}}_k^1 - \mathbf{x}_k^0\|^2]. \quad (36)$$

Now telescoping eq. (34) again over  $t$  from  $t = 0$  to  $t = m - 1$  and applying eq. (36), we obtain

$$\mathbb{E}[F(\mathbf{x}_k^m)] \leq \mathbb{E}[F(\mathbf{y}_k)] + \sum_{t=0}^{m-1} \left(L - \frac{1}{2\eta}\right) \mathbb{E} [\|\bar{\mathbf{x}}_k^{t+1} - \mathbf{x}_k^t\|^2]. \quad (37)$$

Combining all the above facts, we conclude that for  $\eta < \frac{1}{2L}$

$$\mathbb{E}[F(\mathbf{y}_k)] \leq \mathbb{E}[F(\mathbf{y}_{k-1})] \leq \dots \leq F(\mathbf{y}_0). \quad (38)$$

Since  $\mathbb{E}[F(\cdot)]$  is bounded below,  $\mathbb{E}[F(\mathbf{y}_k)]$  decreases to a finite limit, say,  $F^*$ . Define  $r_k = \mathbb{E}[F(\mathbf{y}_k) - F^*]$ , and assume  $r_k > 0$  for all  $k$  (since otherwise  $r_k = 0$  and the algorithm terminates). Applying the KL property with  $\theta = 1/2$ , we obtain

$$\frac{1}{c} (F(\mathbf{x}) - F^*)^{\frac{1}{2}} \leq \text{dist}_{\partial F(\mathbf{x})}(\mathbf{0}). \quad (39)$$

Setting  $\mathbf{x} = \bar{\mathbf{x}}_k^1$ , we further obtain

$$\frac{1}{c^2} (F(\bar{\mathbf{x}}_k^1) - F^*) \leq \text{dist}_{\partial F(\bar{\mathbf{x}}_k^1)}^2(\mathbf{0}) \leq \left(L + \frac{1}{\eta}\right)^2 \|\bar{\mathbf{x}}_k^1 - \mathbf{y}_k\|^2, \quad (40)$$

where the last inequality is due to eq. (33). Taking expectation over both sides and using eq. (36), we obtain

$$\frac{1}{c^2} \mathbb{E}[F(\mathbf{x}_k^m) - F^*] - \frac{\eta L^2 m}{c^2} \mathbb{E}[\|\bar{\mathbf{x}}_k^1 - \mathbf{x}_k^0\|^2] \leq \left(L + \frac{1}{\eta}\right)^2 \mathbb{E}[\|\bar{\mathbf{x}}_k^1 - \mathbf{y}_k\|^2]. \quad (41)$$

Noting that  $\mathbf{x}_k^0 = \mathbf{y}_k$  and  $\mathbb{E}F(\mathbf{y}_{k+1}) \leq \mathbb{E}F(\mathbf{x}_k^m)$ , we then rearrange the above inequality and obtain

$$\frac{1}{c^2} \mathbb{E}[F(\mathbf{y}_{k+1}) - F^*] \leq \frac{1}{c^2} \mathbb{E}[F(\mathbf{x}_k^m) - F^*] \leq \left[ \left(L + \frac{1}{\eta}\right)^2 + \frac{\eta L^2 m}{c^2} \right] \mathbb{E}[\|\bar{\mathbf{x}}_k^1 - \mathbf{y}_k\|^2] \quad (42)$$

$$\leq \frac{\left(L + \frac{1}{\eta}\right)^2 + \frac{\eta L^2 m}{c^2}}{\frac{1}{2\eta} - L} (\mathbb{E}[F(\mathbf{y}_k)] - \mathbb{E}[F(\mathbf{y}_{k+1})]), \quad (43)$$

which can be further rewritten as

$$r_{k+1} \leq d(r_k - r_{k+1}), \quad (44)$$

where  $d = \frac{c^2 \left(L + \frac{1}{\eta}\right)^2 + \eta L^2 m}{\frac{1}{2\eta} - L}$ . Then a simple induction yields that

$$r_{k+1} \leq \left(\frac{d}{d+1}\right)^{k+1} (F(\mathbf{y}_0) - F^*). \quad (45)$$

## E. Proof of Theorem 5

We first introduce some auxiliary lemmas.

**Lemma 4.** Consider the convex function  $g$  and  $\mathbf{x}, \mathbf{y} \in \mathbb{R}^d$  such that  $\mathbf{y} = \text{prox}_{\eta g}^\epsilon(\mathbf{x})$  for some  $\epsilon > 0$ . Then, there exists  $\|\mathbf{i}\| \leq \sqrt{2\eta\epsilon}$  that satisfies the following inequality for all  $\mathbf{z} \in \mathbb{R}^d$ .

$$g(\mathbf{y}) + \frac{1}{2\eta} \|\mathbf{y} - \mathbf{x}\|^2 \leq g(\mathbf{z}) + \frac{1}{2\eta} \|\mathbf{z} - \mathbf{x}\|^2 - \frac{1}{2\eta} \|\mathbf{y} - \mathbf{z}\|^2 + \langle \mathbf{y} - \mathbf{z}, \frac{1}{\eta} \mathbf{i} \rangle + \epsilon. \quad (46)$$

*Proof.* By Lemma 2 in (Schmidt et al., 2011), there exists  $\|\mathbf{i}\| \leq \sqrt{2\eta\epsilon}$  such that

$$\frac{1}{\eta} (\mathbf{x} - \mathbf{y} - \mathbf{i}) \in \partial_\epsilon g(\mathbf{y}). \quad (47)$$

Then, the definition of  $\epsilon$ -subdifferential implies that

$$g(\mathbf{z}) - g(\mathbf{y}) \geq \langle \mathbf{z} - \mathbf{y}, \partial_\epsilon g(\mathbf{y}) \rangle - \epsilon = \langle \mathbf{z} - \mathbf{y}, \frac{1}{\eta} (\mathbf{x} - \mathbf{y} - \mathbf{i}) \rangle - \epsilon, \quad \forall \mathbf{z} \in \mathbb{R}^d. \quad (48)$$

The desired result follows by rearranging the above inequality.  $\square$

**Lemma 5.** Consider the convex function  $g$  and  $\mathbf{x}, \mathbf{y}, \mathbf{d} \in \mathbb{R}^d$  such that  $\mathbf{y} = \text{prox}_{\eta g}^\epsilon(\mathbf{x} - \eta \mathbf{d})$  for some  $\epsilon > 0$ . Then, there exists  $\|\mathbf{i}\| \leq \sqrt{2\eta\epsilon}$  that satisfies the following inequality for all  $\mathbf{z} \in \mathbb{R}^d$ .

$$g(\mathbf{y}) = \langle \mathbf{y} - \mathbf{z}, \mathbf{d} - \frac{1}{\eta} \mathbf{i} \rangle \leq g(\mathbf{z}) + \frac{1}{2\eta} [\|\mathbf{z} - \mathbf{x}\|^2 - \|\mathbf{y} - \mathbf{z}\|^2 - \|\mathbf{y} - \mathbf{x}\|^2] + \epsilon. \quad (49)$$

*Proof.* By Lemma 4, we obtain the following inequality for all  $\mathbf{z} \in \mathbb{R}^d$ .

$$\begin{aligned} g(\mathbf{y}) + \langle \mathbf{y} - \mathbf{x}, \mathbf{d} \rangle + \frac{1}{2\eta} \|\mathbf{y} - \mathbf{x}\|^2 + \frac{\eta}{2} \|\mathbf{d}\|^2 \\ \leq g(\mathbf{z}) + \frac{1}{2\eta} \|\mathbf{z} - \mathbf{x} + \eta \mathbf{d}\|^2 - \frac{1}{2\eta} \|\mathbf{y} - \mathbf{z}\|^2 + \langle \mathbf{y} - \mathbf{z}, \frac{1}{\eta} \mathbf{i} \rangle + \epsilon \\ = g(\mathbf{z}) + \langle \mathbf{z} - \mathbf{x}, \mathbf{d} \rangle \frac{1}{2\eta} \|\mathbf{z} - \mathbf{x}\|^2 + \frac{\eta}{2} \|\mathbf{d}\|^2 - \frac{1}{2\eta} \|\mathbf{y} - \mathbf{z}\|^2 + \langle \mathbf{y} - \mathbf{z}, \frac{1}{\eta} \mathbf{i} \rangle + \epsilon. \end{aligned} \quad (50)$$

The desired result follows by rearranging the above inequality.  $\square$

**Lemma 6.** Consider the convex function  $g$  and  $\mathbf{x}, \mathbf{y}, \mathbf{d} \in \mathbb{R}^d$  such that  $\mathbf{y} = \text{prox}_{\eta g}^\epsilon(\mathbf{x} - \eta \mathbf{d})$  for some  $\epsilon > 0$ . Then, there exists  $\|\mathbf{i}\| \leq \sqrt{2\eta\epsilon}$  that satisfies the following inequality for all  $\mathbf{z} \in \mathbb{R}^d$ .

$$F(\mathbf{y}) + \langle \mathbf{y} - \mathbf{z}, \mathbf{d} - \frac{1}{\eta} \mathbf{i} - \nabla f(\mathbf{x}) \rangle \leq F(\mathbf{z}) + \left(\frac{L}{2} - \frac{1}{2\eta}\right) \|\mathbf{y} - \mathbf{x}\|^2 + \left(\frac{L}{2} + \frac{1}{2\eta}\right) \|\mathbf{z} - \mathbf{x}\|^2 - \frac{1}{2\eta} \|\mathbf{y} - \mathbf{z}\|^2 + \epsilon. \quad (51)$$

*Proof.* By Lipschitz continuity of  $\nabla f$ , we obtain

$$f(\mathbf{y}) \leq f(\mathbf{x}) + \langle \nabla f(\mathbf{x}), \mathbf{y} - \mathbf{x} \rangle + \frac{L}{2} \|\mathbf{y} - \mathbf{x}\|^2, \quad (52)$$

$$f(\mathbf{x}) \leq f(\mathbf{z}) + \langle \nabla f(\mathbf{x}), \mathbf{x} - \mathbf{z} \rangle + \frac{L}{2} \|\mathbf{x} - \mathbf{z}\|^2. \quad (53)$$

Adding the above inequalities together yields

$$f(\mathbf{y}) \leq f(\mathbf{z}) + \langle \nabla f(\mathbf{x}), \mathbf{y} - \mathbf{z} \rangle + \frac{L}{2} [\|\mathbf{y} - \mathbf{x}\|^2 + \|\mathbf{z} - \mathbf{x}\|^2]. \quad (54)$$

Combining with Lemma 5, we then obtain the desired result.  $\square$

Recall the reference sequence  $\bar{\mathbf{x}}_k^{t+1} = \text{prox}_{\eta g}(\mathbf{x}_k^t - \eta \nabla f(\mathbf{x}_k^t))$ . Applying Lemma 6 with  $\epsilon = 0$ ,  $\mathbf{y} = \bar{\mathbf{x}}_k^{t+1}$ ,  $\mathbf{z} = \mathbf{x}_k^t$ , and  $\mathbf{d} = \nabla f(\mathbf{x}_k^t)$  and taking expectation on both sides, we obtain

$$\mathbb{E}[F(\bar{\mathbf{x}}_k^{t+1})] \leq \mathbb{E} \left[ F(\mathbf{x}_k^t) + \left( \frac{L}{2} - \frac{1}{2\eta} \right) \|\bar{\mathbf{x}}_k^{t+1} - \mathbf{x}_k^t\|^2 - \frac{1}{2\eta} \|\bar{\mathbf{x}}_k^{t+1} - \mathbf{x}_k^t\|^2 \right]. \quad (55)$$

Similarly, applying Lemma 6 with  $\epsilon = \epsilon_k^t$ ,  $\mathbf{y} = \mathbf{x}_k^{t+1}$ ,  $\mathbf{z} = \bar{\mathbf{x}}_k^{t+1}$ ,  $\mathbf{d} = \mathbf{v}_k^t$  and taking expectation on both sides, we obtain

$$\begin{aligned} \mathbb{E}[F(\mathbf{x}_k^{t+1})] &\leq \mathbb{E} \left[ F(\bar{\mathbf{x}}_k^{t+1}) + \langle \mathbf{x}_k^{t+1} - \bar{\mathbf{x}}_k^{t+1}, \nabla f(\mathbf{x}_k^t) - \mathbf{v}_k^t + \frac{1}{\eta} \mathbf{i}_k \rangle \right. \\ &\quad \left. + \left( \frac{L}{2} - \frac{1}{2\eta} \right) \|\mathbf{x}_k^{t+1} - \bar{\mathbf{x}}_k^{t+1}\|^2 + \left( \frac{L}{2} + \frac{1}{2\eta} \right) \|\bar{\mathbf{x}}_k^{t+1} - \mathbf{x}_k^t\|^2 - \frac{1}{2\eta} \|\bar{\mathbf{x}}_k^{t+1} - \mathbf{x}_k^{t+1}\|^2 + \epsilon_k^t \right]. \end{aligned} \quad (56)$$

Adding eq. (55) and eq. (56) together yields

$$\mathbb{E}[F(\mathbf{x}_k^{t+1})] \leq \mathbb{E} \left[ F(\mathbf{x}_k^t) + \left( L - \frac{1}{2\eta} \right) \|\bar{\mathbf{x}}_k^{t+1} - \mathbf{x}_k^t\|^2 + \left( \frac{L}{2} - \frac{1}{2\eta} \right) \|\mathbf{x}_k^{t+1} - \mathbf{x}_k^t\|^2 - \frac{1}{2\eta} \|\bar{\mathbf{x}}_k^{t+1} - \mathbf{x}_k^{t+1}\|^2 + T \right] \quad (57)$$

where  $T = \langle \mathbf{x}_k^{t+1} - \bar{\mathbf{x}}_k^{t+1}, \nabla f(\mathbf{x}_k^t) - \mathbf{v}_k^t + \frac{\mathbf{i}_k}{\eta} \rangle + \epsilon_k^t$ . Now we bound  $\mathbb{E}[T]$  as follows.

$$\mathbb{E}[T] \leq \frac{1}{2\eta} \mathbb{E} [\|\mathbf{x}_k^{t+1} - \bar{\mathbf{x}}_k^{t+1}\|^2] + \frac{\eta}{2} \mathbb{E} [\|\nabla f(\mathbf{x}_k^t) - \mathbf{v}_k^t + \frac{\mathbf{i}_k}{\eta}\|^2] + \epsilon_k^t \quad (58)$$

$$\leq \frac{1}{2\eta} \mathbb{E} [\|\mathbf{x}_k^{t+1} - \bar{\mathbf{x}}_k^{t+1}\|^2] + \eta \mathbb{E} [\|\nabla f(\mathbf{x}_k^t) - \mathbf{v}_k^t\|^2] + \eta \mathbb{E} \left[ \left\| \frac{\mathbf{i}_k}{\eta} \right\|^2 \right] + \epsilon_k^t \quad (59)$$

$$\leq \frac{1}{2\eta} \mathbb{E} [\|\mathbf{x}_k^{t+1} - \bar{\mathbf{x}}_k^{t+1}\|^2] + \eta \mathbb{E} [\|\nabla f(\mathbf{x}_k^t) - \mathbf{v}_k^t\|^2] + 3\epsilon_k^t. \quad (60)$$

By Lemma 3 of (Reddi et al., 2016b), it holds that  $\mathbb{E} [\|\nabla f(\mathbf{x}_k^t) - \mathbf{v}_k^t\|^2] \leq L^2 \mathbb{E} [\|\mathbf{x}_k^t - \mathbf{x}_k^0\|^2]$ . Combining with the above inequality, we further obtain that

$$\mathbb{E}[T] \leq \frac{1}{2\eta} \mathbb{E} [\|\mathbf{x}_k^{t+1} - \bar{\mathbf{x}}_k^{t+1}\|^2] + \eta L^2 \mathbb{E} [\|\mathbf{x}_k^t - \mathbf{x}_k^0\|^2] + 3\epsilon_k^t. \quad (61)$$

Substituting the above result into eq. (57), we obtain

$$\mathbb{E}[F(\mathbf{x}_k^{t+1})] \leq \mathbb{E} \left[ F(\mathbf{x}_k^t) + \left( L - \frac{1}{2\eta} \right) \|\bar{\mathbf{x}}_k^{t+1} - \mathbf{x}_k^t\|^2 + \left( \frac{L}{2} - \frac{1}{2\eta} \right) \|\mathbf{x}_k^{t+1} - \mathbf{x}_k^t\|^2 + \eta L^2 \|\mathbf{x}_k^t - \mathbf{x}_k^0\|^2 + 3\epsilon_k^t \right]. \quad (62)$$

Recalling that  $R_k^t := \mathbb{E} [F(\mathbf{x}_k^t) + c_t \|\mathbf{x}_k^t - \mathbf{x}_k^0\|^2]$ , where  $c_t = \eta L^2 \frac{(1+\beta)^{m-t-1}}{\beta}$  with  $\beta > 0$ . Then, we can upper bound  $R_k^{t+1}$  as

$$R_k^{t+1} = \mathbb{E} [F(\mathbf{x}_k^{t+1}) + c_{t+1} \|\mathbf{x}_k^{t+1} - \mathbf{x}_k^t + \mathbf{x}_k^t - \mathbf{x}_k^0\|^2] \quad (63)$$

$$= \mathbb{E} [F(\mathbf{x}_k^{t+1}) + c_{t+1} (\|\mathbf{x}_k^{t+1} - \mathbf{x}_k^t\|^2 + \|\mathbf{x}_k^t - \mathbf{x}_k^0\|^2 + 2\langle \mathbf{x}_k^{t+1} - \mathbf{x}_k^t, \mathbf{x}_k^t - \mathbf{x}_k^0 \rangle)] \quad (64)$$

$$\leq \mathbb{E} [F(\mathbf{x}_k^{t+1}) + c_{t+1} \left( 1 + \frac{1}{\beta} \right) \|\mathbf{x}_k^{t+1} - \mathbf{x}_k^t\|^2 + c_{t+1} (1 + \beta) \|\mathbf{x}_k^t - \mathbf{x}_k^0\|^2] \quad (65)$$

$$\leq \mathbb{E} \left[ F(\mathbf{x}_k^t) + \left( L - \frac{1}{2\eta} \right) \|\bar{\mathbf{x}}_k^{t+1} - \mathbf{x}_k^t\|^2 + \left[ c_{t+1} \left( 1 + \frac{1}{\beta} \right) + \frac{L}{2} - \frac{1}{2\eta} \right] \|\mathbf{x}_k^{t+1} - \mathbf{x}_k^t\|^2 \right. \quad (66)$$

$$\left. + [c_{t+1} (1 + \beta) + \eta L^2] \|\mathbf{x}_k^t - \mathbf{x}_k^0\|^2 + 3\epsilon_k^t \right]. \quad (67)$$

Setting  $\beta = 1/m$  in  $c_t$  and observe that

$$c_t = \eta L^2 \frac{(1+\beta)^{m-t}-1}{\beta} = \eta L^2 m \left( (1+\beta)^{m-t} - 1 \right) \leq \eta L^2 m (e-1) \leq 2\eta L^2 m, \quad (68)$$

which further implies that

$$c_{t+1} \left( 1 + \frac{1}{\beta} \right) + \frac{L}{2} \leq 2\eta L^2 m (1+m) \leq 4\eta L^2 m^2 + \frac{L}{2} = 4\rho L m^2 + \frac{L}{2} \leq \frac{1}{2\eta}. \quad (69)$$

Also note that  $c_t = c_{t+1}(1+\beta) + \eta L^2$ . Collecting all these facts,  $R_k^{t+1}$  can be further upper bounded by

$$R_k^{t+1} \leq R_k^t + \mathbb{E} \left[ \left( L - \frac{1}{2\eta} \right) \|\bar{\mathbf{x}}_k^{t+1} - \mathbf{x}_k^t\|^2 + 3\epsilon_k^t \right]. \quad (70)$$

Telescoping eq. (70) from  $t = 1$  to  $t = m-1$ , we obtain

$$\mathbb{E}[F(\mathbf{x}_k^m)] \leq \mathbb{E} \left[ F(\bar{\mathbf{x}}_k^1) + c_1 \|\bar{\mathbf{x}}_k^1 - \mathbf{x}_k^0\|^2 + \sum_{t=1}^{m-1} \left( L - \frac{1}{2\eta} \right) \|\bar{\mathbf{x}}_k^{t+1} - \mathbf{x}_k^t\|^2 + \sum_{t=1}^{m-1} 3\epsilon_k^t \right]. \quad (71)$$

Again, telescoping eq. (70) from  $t = 0$  to  $t = m-1$  we obtain

$$\mathbb{E}[F(\mathbf{y}_{k+1})] \leq \mathbb{E}[F(\mathbf{x}_k^m)] \leq \mathbb{E}[F(\mathbf{y}_k)] + \sum_{t=0}^{m-1} \left( L - \frac{1}{2\eta} \right) \mathbb{E} [\|\bar{\mathbf{x}}_k^{t+1} - \mathbf{x}_k^t\|^2] + 3 \sum_{t=0}^{m-1} \mathbb{E} [\epsilon_k^t]. \quad (72)$$

Assume  $\sum_{t=0}^{m-1} \mathbb{E} [\|\bar{\mathbf{x}}_k^{t+1} - \mathbf{x}_k^t\|^2] > 0$ , because otherwise the algorithm is terminated. Assume that there exists  $\alpha > 0$  such that  $3 \sum_{t=0}^{m-1} \mathbb{E} [\epsilon_k^t] \leq \alpha \sum_{t=0}^{m-1} \mathbb{E} [\|\bar{\mathbf{x}}_k^{t+1} - \mathbf{x}_k^t\|^2]$  and  $\frac{1}{2\eta} - L - \alpha > 0$ . Then eq. (72) further implies that

$$\mathbb{E}[F(\mathbf{y}_{k+1})] \leq \mathbb{E}[F(\mathbf{x}_k^m)] \leq \mathbb{E}[F(\mathbf{y}_k)] + \sum_{t=0}^{m-1} \left( L - \frac{1}{2\eta} + \alpha \right) \mathbb{E} [\|\bar{\mathbf{x}}_k^{t+1} - \mathbf{x}_k^t\|^2]. \quad (73)$$

That is, we have  $\mathbb{E}[F(\mathbf{y}_k)] \leq \mathbb{E}[F(\mathbf{y}_{k-1})] \leq \dots \leq F(\mathbf{y}_0)$ , and hence  $\mathbb{E}[F(\mathbf{y}_k)] \downarrow F^*$ . We can further upper bound eq. (71) as

$$\begin{aligned} \mathbb{E}[F(\mathbf{x}_k^m)] &\leq \mathbb{E} \left[ F(\bar{\mathbf{x}}_k^1) + c_1 \|\bar{\mathbf{x}}_k^1 - \mathbf{x}_k^0\|^2 + \sum_{t=1}^{m-1} \left( L - \frac{1}{2\eta} \right) \|\bar{\mathbf{x}}_k^{t+1} - \mathbf{x}_k^t\|^2 + \sum_{t=1}^{m-1} 3\epsilon_k^t \right] \\ &\leq \mathbb{E} \left[ F(\bar{\mathbf{x}}_k^1) + c_1 \|\bar{\mathbf{x}}_k^1 - \mathbf{x}_k^0\|^2 - \left( L - \frac{1}{2\eta} \right) \|\bar{\mathbf{x}}_k^1 - \mathbf{x}_k^0\|^2 + \sum_{t=0}^{m-1} \left( L - \frac{1}{2\eta} \right) \|\bar{\mathbf{x}}_k^{t+1} - \mathbf{x}_k^t\|^2 + \sum_{t=0}^{m-1} 3\epsilon_k^t \right] \\ &\leq \mathbb{E} \left[ F(\bar{\mathbf{x}}_k^1) + \left( c_1 + \frac{1}{2\eta} \right) \|\bar{\mathbf{x}}_k^1 - \mathbf{x}_k^0\|^2 + \sum_{t=0}^{m-1} \left( L - \frac{1}{2\eta} + \alpha \right) \|\bar{\mathbf{x}}_k^{t+1} - \mathbf{x}_k^t\|^2 \right] \\ &\leq \mathbb{E} [F(\bar{\mathbf{x}}_k^1)] + \mathbb{E} \left[ \left( 2\eta L^2 m + \frac{1}{2\eta} \right) \|\bar{\mathbf{x}}_k^1 - \mathbf{x}_k^0\|^2 \right]. \end{aligned} \quad (74)$$

Define  $r_k = \mathbb{E}[F(\mathbf{y}_k) - F^*]$ , and suppose  $r_k > 0$  for all  $k$  (otherwise the algorithm terminates in finite steps). Applying the KL condition with  $\theta = 1/2$ , we obtain

$$\frac{1}{c} (F(\mathbf{x}) - F^*)^{\frac{1}{2}} \leq \text{dist}_{\partial F(\mathbf{x})}(\mathbf{0}). \quad (75)$$

Setting  $\mathbf{x} = \bar{\mathbf{x}}_k^1$ , we obtain

$$\frac{1}{c^2} (F(\bar{\mathbf{x}}_k^1) - F^*) \leq \text{dist}_{\partial F(\bar{\mathbf{x}}_k^1)}^2(\mathbf{0}) \leq \left( L + \frac{1}{\eta} \right)^2 \|\bar{\mathbf{x}}_k^1 - \mathbf{y}_k\|^2. \quad (76)$$

Taking expectation on both sides and using the result from eq. (74), we obtain

$$\frac{1}{c^2} \mathbb{E}[F(\mathbf{x}_k^m) - F^*] - \frac{2\eta L^2 m + \frac{1}{2\eta}}{c^2} \mathbb{E}[\|\bar{\mathbf{x}}_k^1 - \mathbf{x}_k^0\|^2] \leq \left(L + \frac{1}{\eta}\right)^2 \mathbb{E}[\|\bar{\mathbf{x}}_k^1 - \mathbf{y}_k\|^2]. \quad (77)$$

Note that  $\mathbf{x}_k^0 = \mathbf{y}_k$ . Then rearranging the above inequality yields

$$\frac{1}{c^2} \mathbb{E}[F(\mathbf{y}_{k+1}) - F^*] \leq \frac{1}{c^2} \mathbb{E}[F(\mathbf{x}_k^m) - F^*] \leq \left[ \left(L + \frac{1}{\eta}\right)^2 + \frac{2\eta L^2 m + \frac{1}{2\eta}}{c^2} \right] \mathbb{E}[\|\bar{\mathbf{x}}_k^1 - \mathbf{y}_k\|^2] \quad (78)$$

$$\leq \frac{\left(L + \frac{1}{\eta}\right)^2 + \frac{2\eta L^2 m + \frac{1}{2\eta}}{c^2}}{\frac{1}{2\eta} - L - \alpha} (\mathbb{E}[F(\mathbf{y}_k)] - \mathbb{E}[F(\mathbf{y}_{k+1})]), \quad (79)$$

which can be rewritten as  $r_{k+1} \leq d(r_k - r_{k+1})$  with  $d = \frac{c^2 \left(L + \frac{1}{\eta}\right)^2 + 2\eta L^2 m + \frac{1}{2\eta}}{\frac{1}{2\eta} - L - \alpha}$ . Then, induction yields that

$$r_{k+1} \leq \frac{d}{d+1} r_k \leq \left(\frac{d}{d+1}\right)^{k+1} (F(\mathbf{y}_0) - F^*). \quad (80)$$
